# Supplementary material
Source: PubMed Central journal article supplement (PMC2739124)
Supplement: NIHMS130168-supplement-1_si_001.pdf [file NIHMS130168-supplement-1_si_001.pdf]

**Supplementary Material for:**

**Cerium, Europium and Ytterbium Complexes with Alcohol Donor  
Groups as Chemical Exchange Saturation Transfer Agents for MRI**

Ching-Hui Huang and Janet R. Morrow

Department of Chemistry, 526 Natural Sciences Complex

University at Buffalo, State University of New York, Amherst, NY 14260-3000

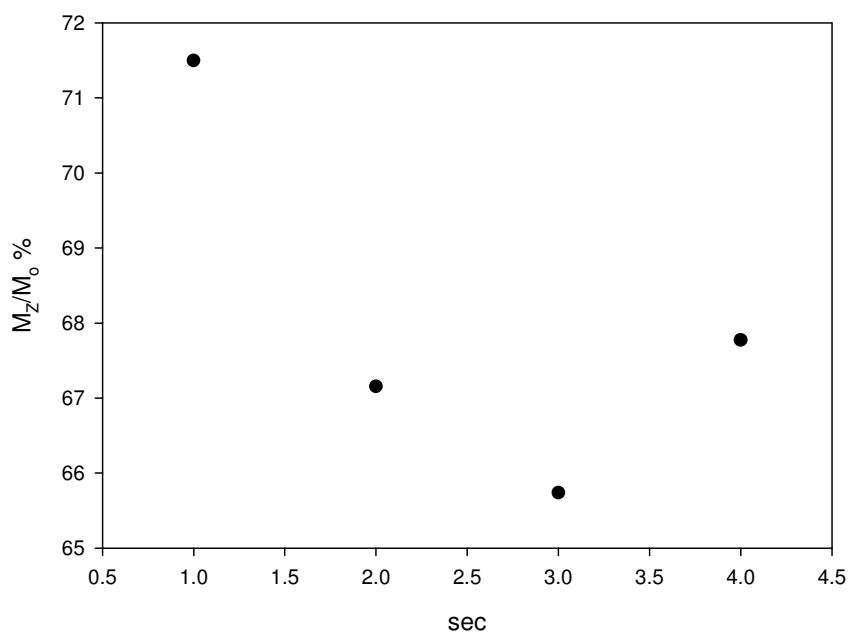

Figure S1. The CEST efficiency of the complex  $\text{Ce}(\text{S-THP})^{3+}$  as a function of saturation time,  $B_1=40$  db at room temperature, 20 mM MES buffer, pH 6.5, 100 mM NaCl.

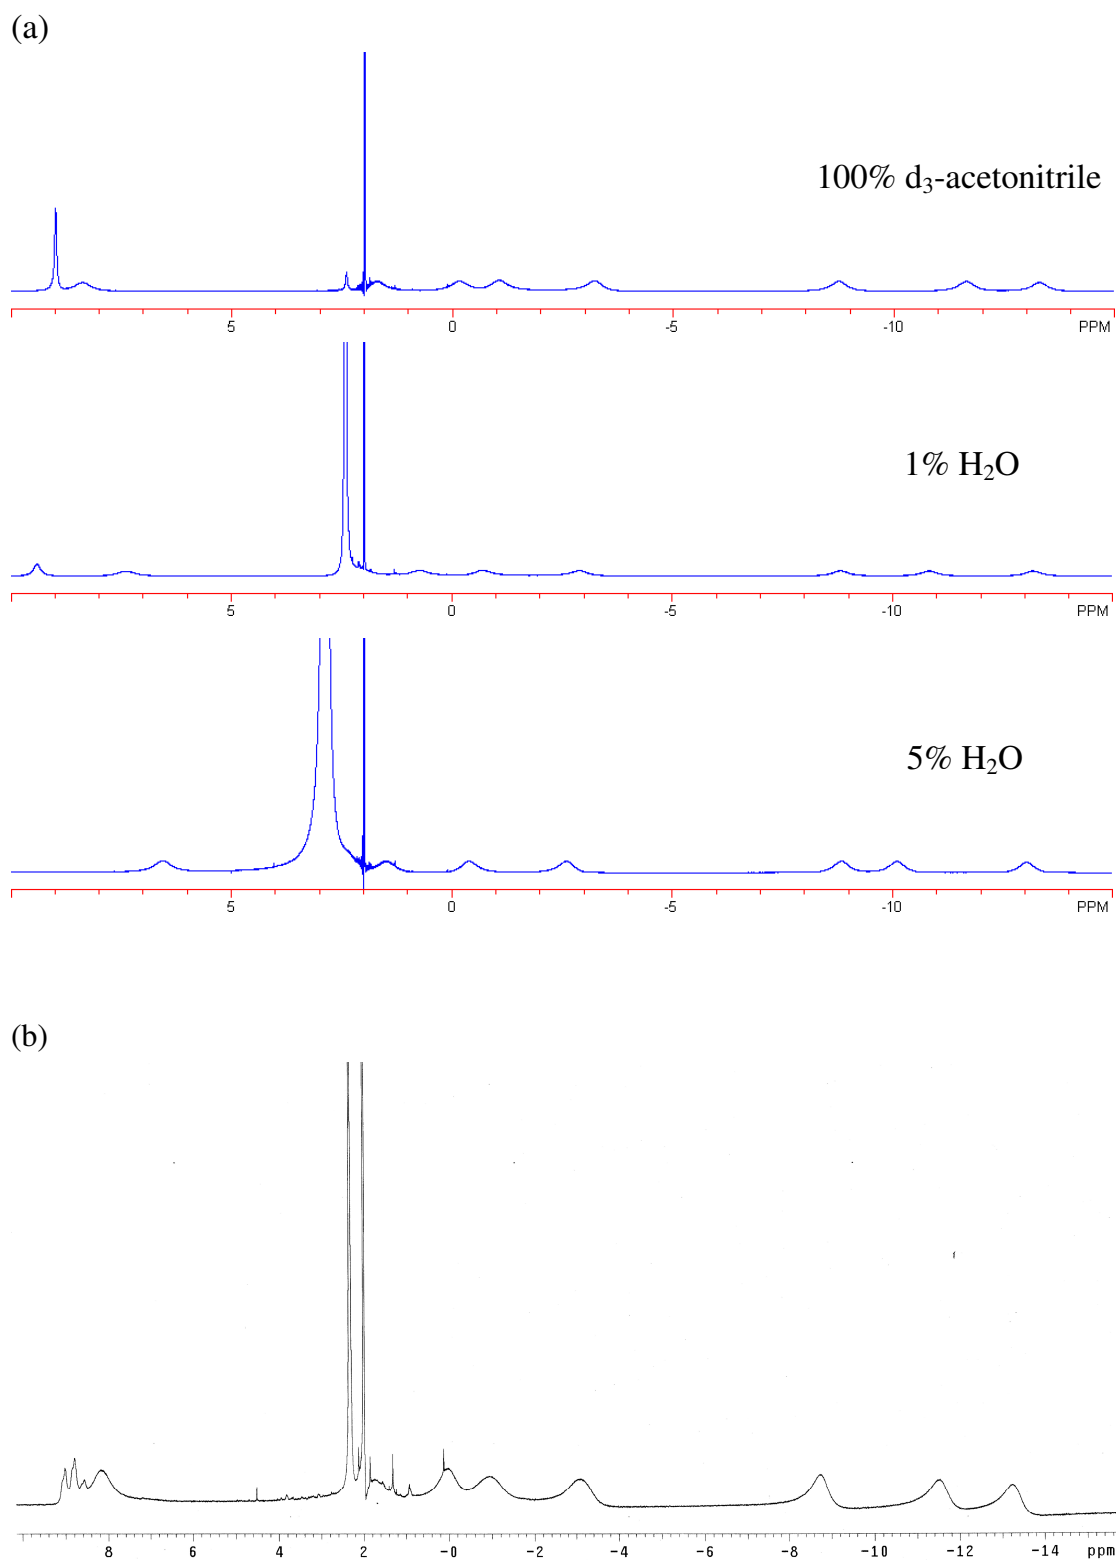

Figure S2. (a)  $^1\text{H}$  NMR spectra of  $\text{Eu}(\text{THED})^{3+}$  with different concentrations of water in  $\text{d}_3$ -acetonitrile. (b)  $^1\text{H}$  NMR spectrum of  $\text{Eu}(\text{THED})^{3+}$  after partial H/D exchange.

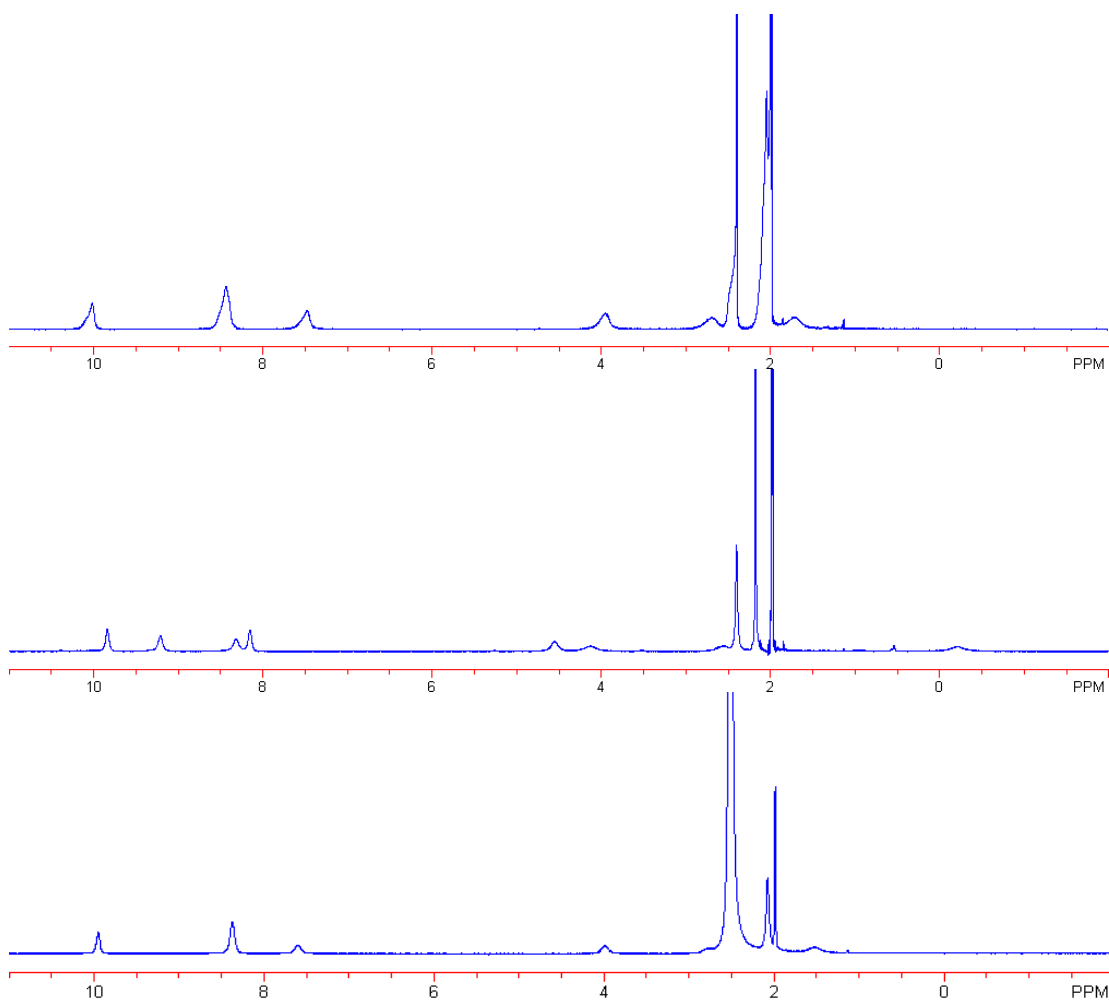

Figure S3. <sup>1</sup>H NMR spectra of Nd(S-THP)<sup>3+</sup>. Upper: sample in d<sub>3</sub>-acetonitrile with addition of 1 drop of D<sub>2</sub>O. Middle: sample in d<sub>3</sub>-acetonitrile. Bottom: sample in d<sub>3</sub>-acetonitrile with addition of 5 % H<sub>2</sub>O.

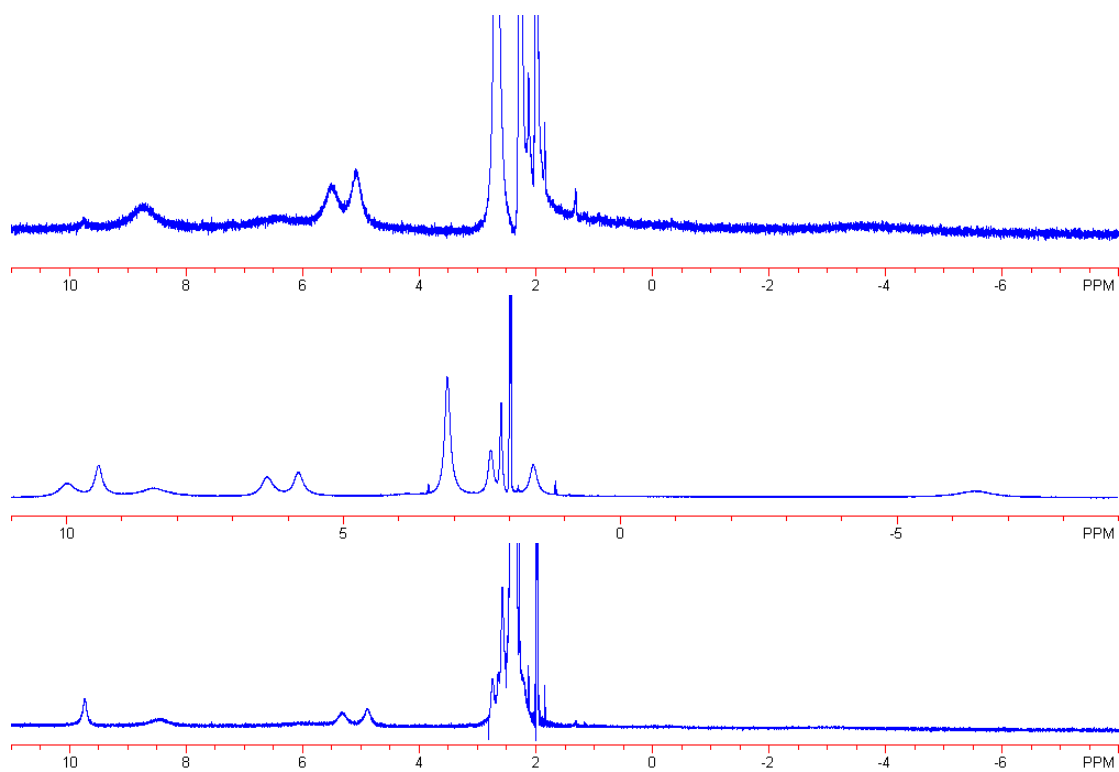

Figure S4. <sup>1</sup>H NMR spectra of Ce(S-THP)<sup>3+</sup>. Upper: sample in d<sub>3</sub>-acetonitrile with addition of 1 drop of D<sub>2</sub>O. Middle: sample in d<sub>3</sub>-acetonitrile. Bottom: sample in d<sub>3</sub>-acetonitrile with addition of 10 % H<sub>2</sub>O.

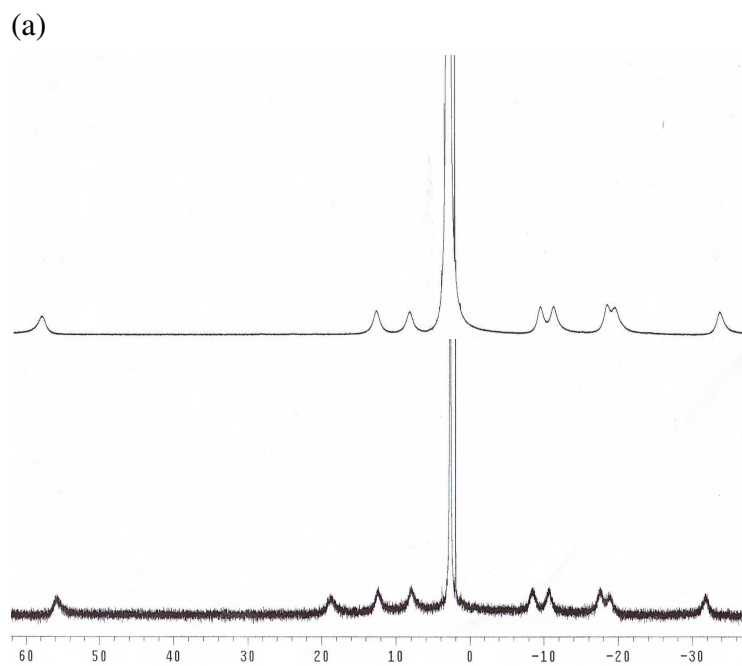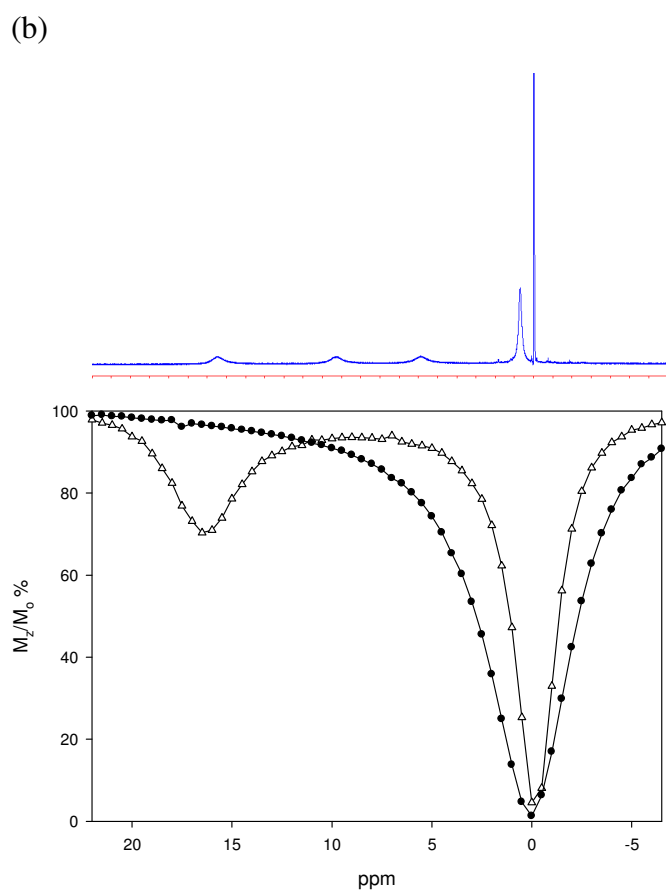

Figure S5. (a)  $\text{Yb}(\text{THED})^{3+}$  dissolved in  $\text{d}_3$ -acetonitrile (bottom) and upon addition of 1%  $\text{H}_2\text{O}$  (top). (b) CEST spectrum of 10 mM  $\text{Yb}(\text{THED})^{3+}$  in  $\text{d}_3$ -acetonitrile with no added water ( $\Delta$ ), addition of 1%  $\text{H}_2\text{O}$  ( $\bullet$ ). The  $^1\text{H}$  NMR spectrum shown on the top of the CEST spectrum is for the samples dissolved in dry  $\text{d}_3$ -acetonitrile solution.

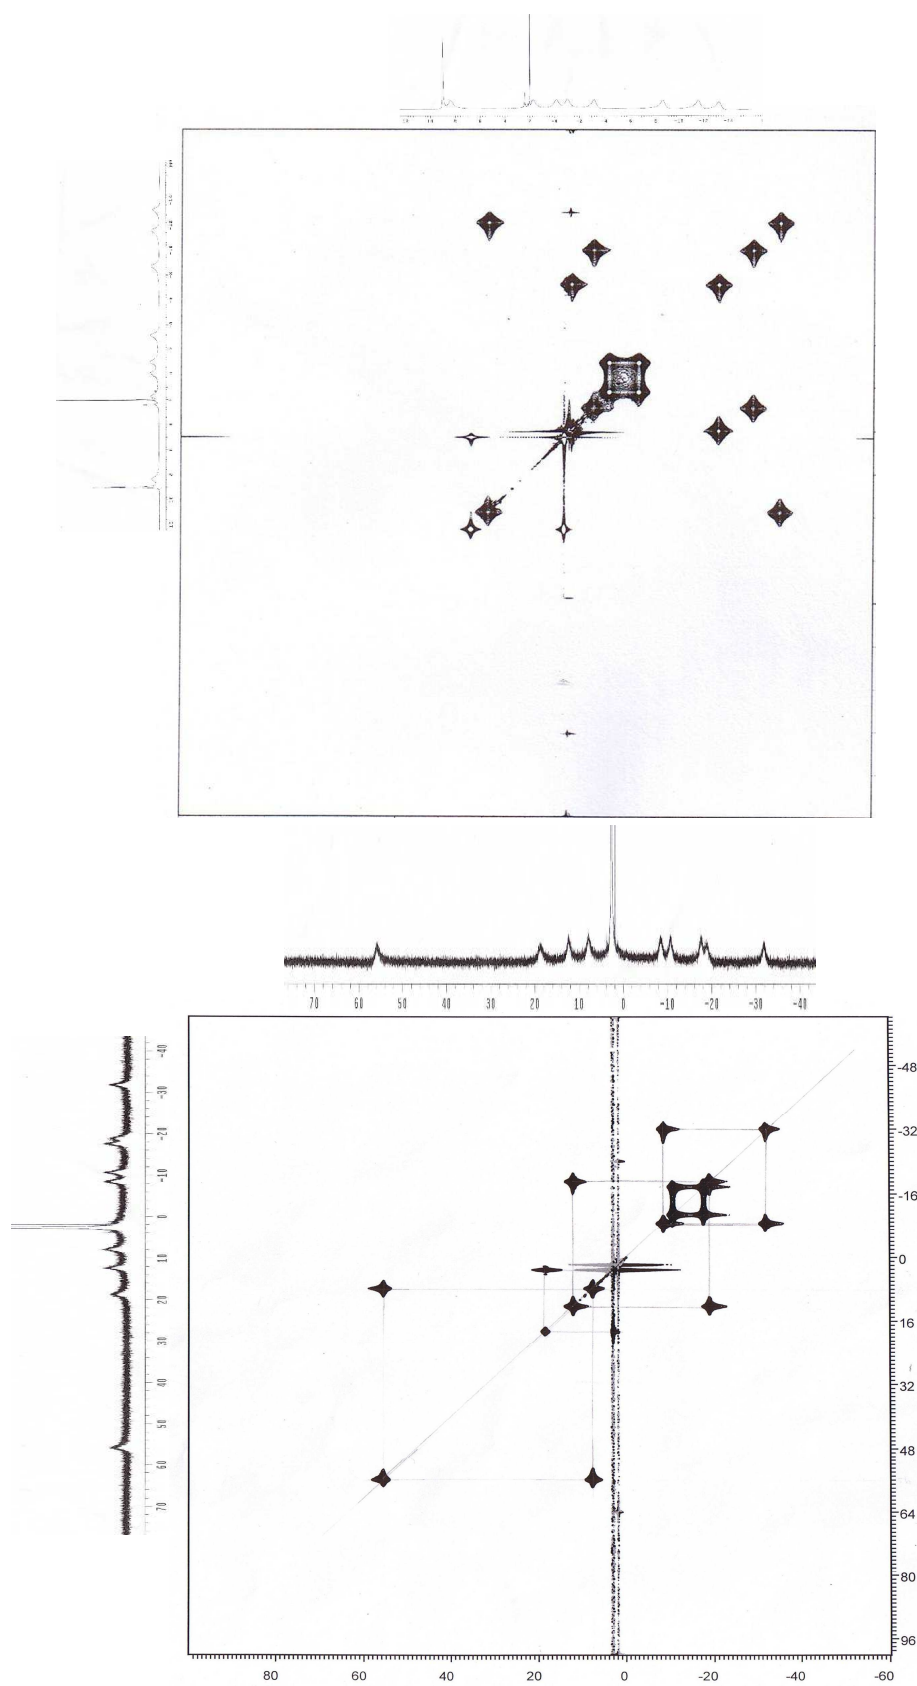

Figure S6. Two-dimensional exchange spectrum of  $\text{Eu}(\text{THED})^{3+}$  (upper) and  $\text{Yb}(\text{THED})^{3+}$  (lower) in  $\text{d}_3$ -acetonitrile with 1%  $\text{H}_2\text{O}$ .

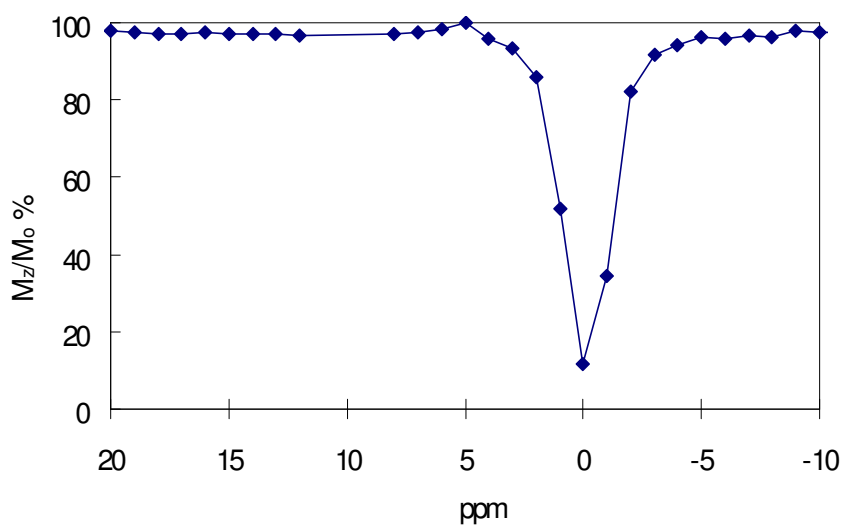

Figure S7. The CEST spectrum of 10 mM Nd(**S-THP**)<sup>3+</sup> in d<sub>3</sub>-acetonitrile with 5% H<sub>2</sub>O.

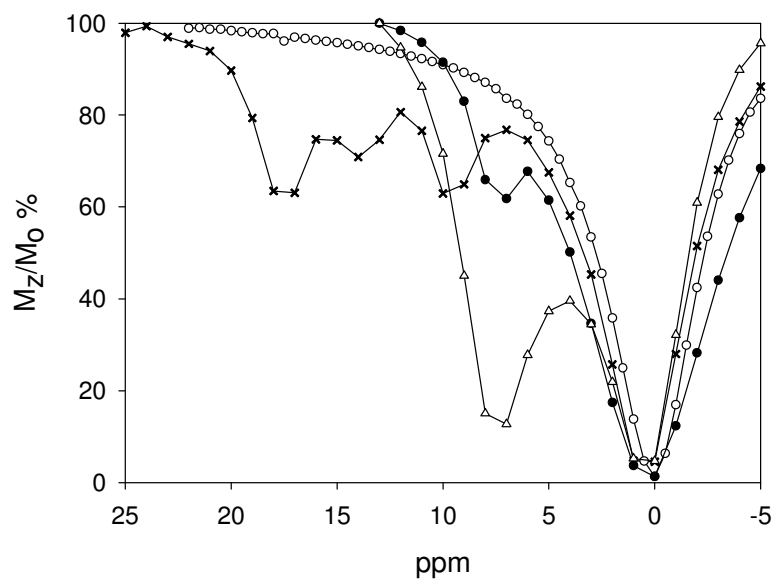

Figure S8. The CEST spectrum of 10 mM Ln(III) complex with addition of 1% H<sub>2</sub>O in d<sub>3</sub>-acetonitrile. (( $\Delta$ ) Eu(**THED**)<sup>3+</sup>; ( $\circ$ ) Yb(**THED**)<sup>3+</sup>; ( $\times$ ) Eu(**CNPHC**)<sup>3+</sup>; ( $\bullet$ ) Ce(**S-THP**)<sup>3+</sup>).



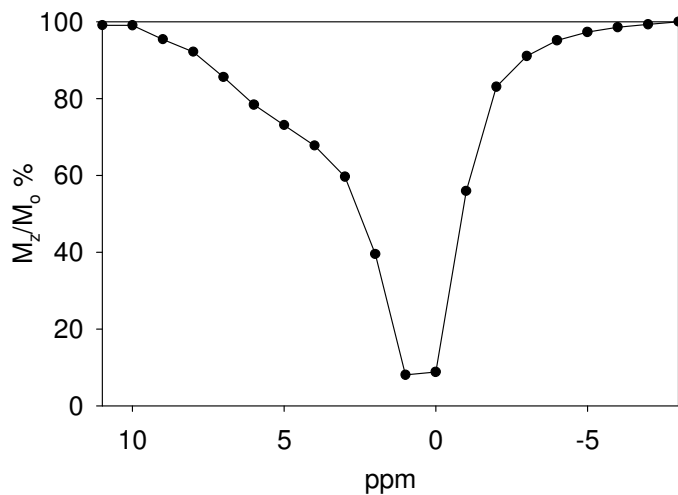

Figure S9. The CEST spectrum of 10 mM Eu(**THED**)<sup>3+</sup> with 20 mM MES buffer, 100 mM NaCl at pH 5.6.

(a)

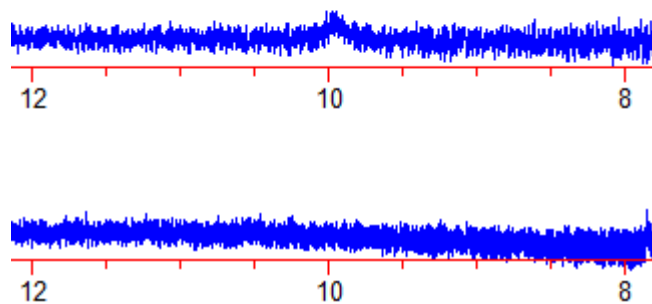

(b)

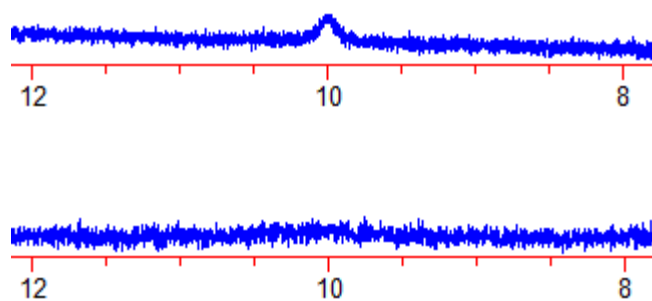

Figure S10. (a) 5 mM Eu(**S-THP**)<sup>3+</sup> at pH 3.1 (upper) and pH 6.6 (lower). (b) 10 mM Ce(**S-THP**)<sup>3+</sup> at pH 4.5 (upper) and pH 6.1 (lower).
